# Supplementary material
Source: Springer Nature journal article supplement (https://www.springermedizin.de/resource/supplementary/13256_2011_2008_MOESM5_ESM.pdf/9649692)

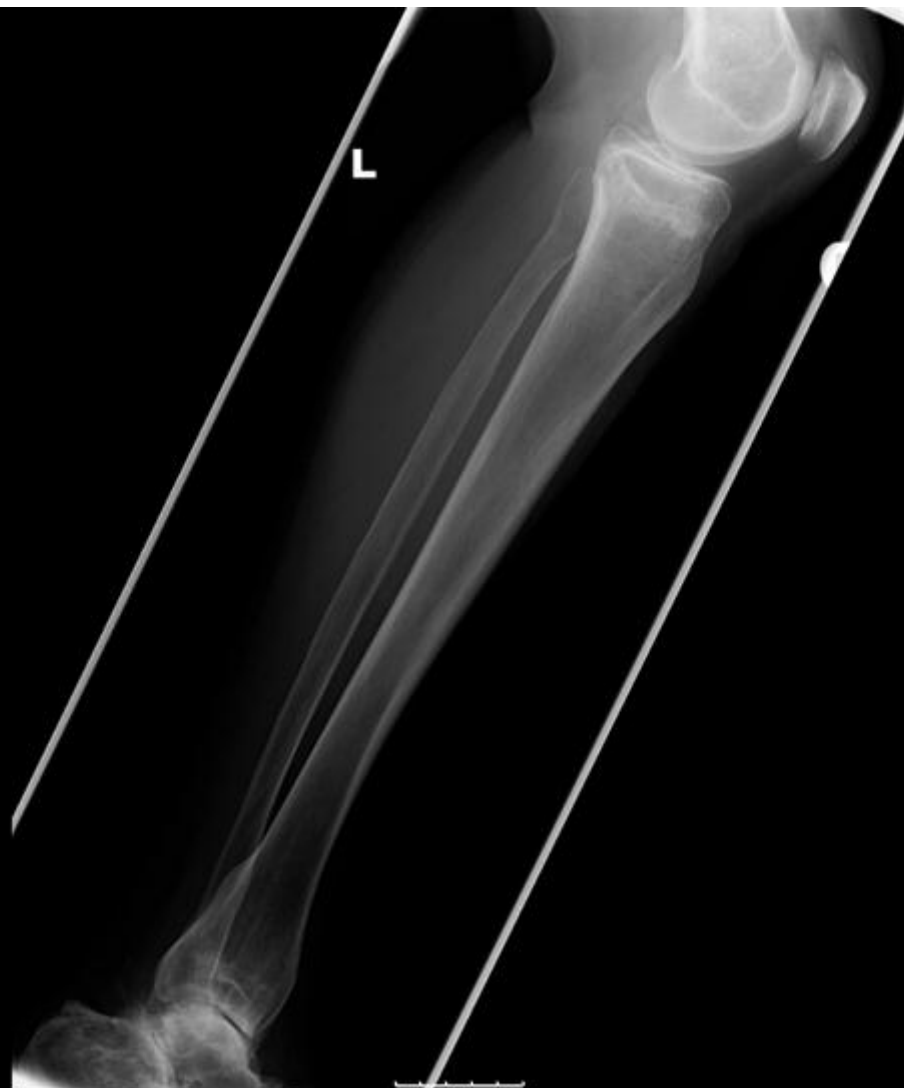

Supplement: MOESM5 [file 9649692]
